# Supplementary material for: Multiferroic Coupling of Ferromagnetic and Ferroelectric Particles through Elastic Polymers
Source: Polymers (Basel). 2021 Dec 31;14(1):153. doi: 10.3390/polym14010153 (PMC8747388; doi:10.3390/polym14010153)
Supplement: Supplementary file 1 [file polymers-14-00153-s001.zip › polymers-1498345-supplementary.pdf]

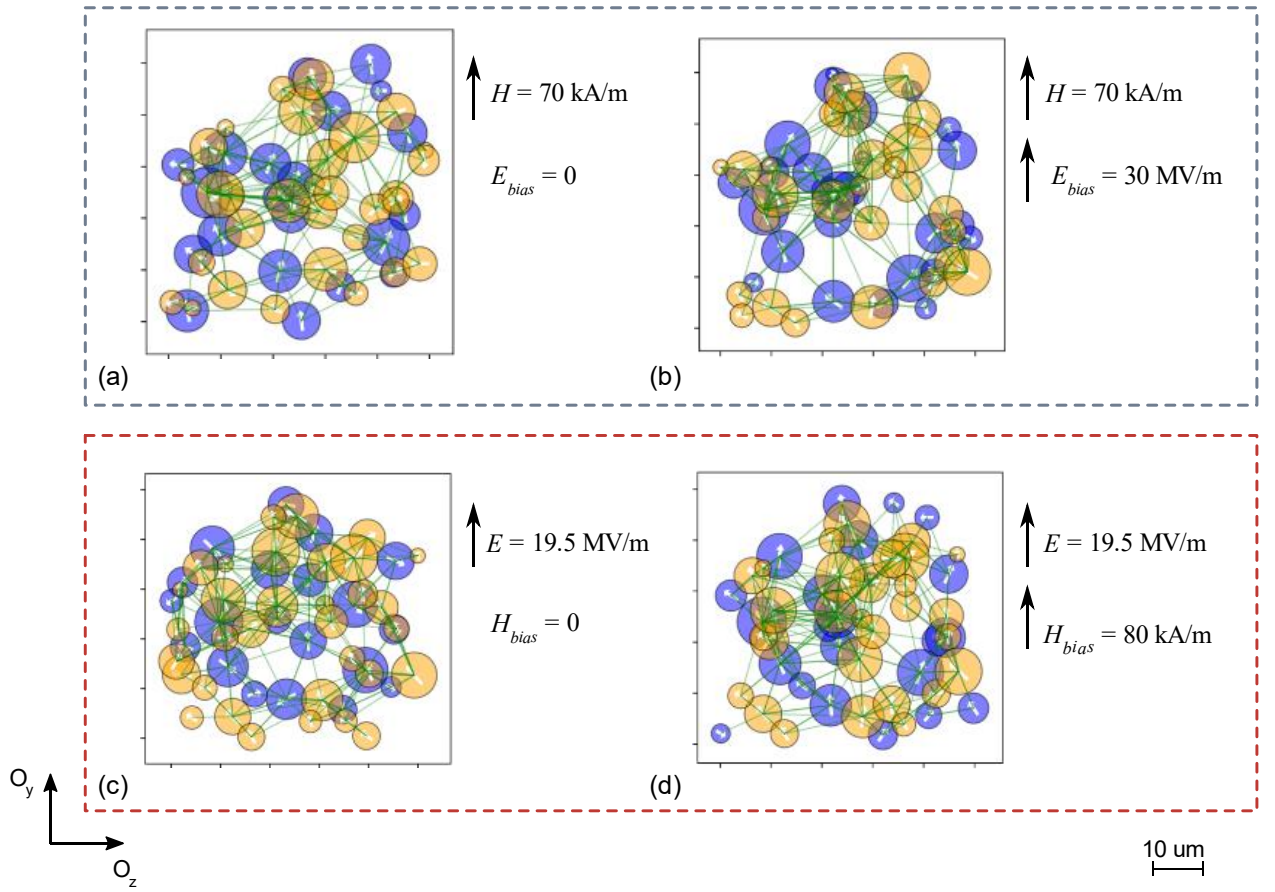

Figure S1. Snapshots of the sample box under the biasing magnetic field  $H_{bias} = 70$  kA/m and acting electric field (a)  $E = 0$  and (b)  $E = 30$  MV/m. Symmetric case: the sample box under the biasing electric field  $E_{bias} = 19.5$  MV/m and magnetic field of (c)  $H = 0$  and (d)  $H = 80$  kA/m. For clarity of visualization, the polymer beads are made entirely transparent.

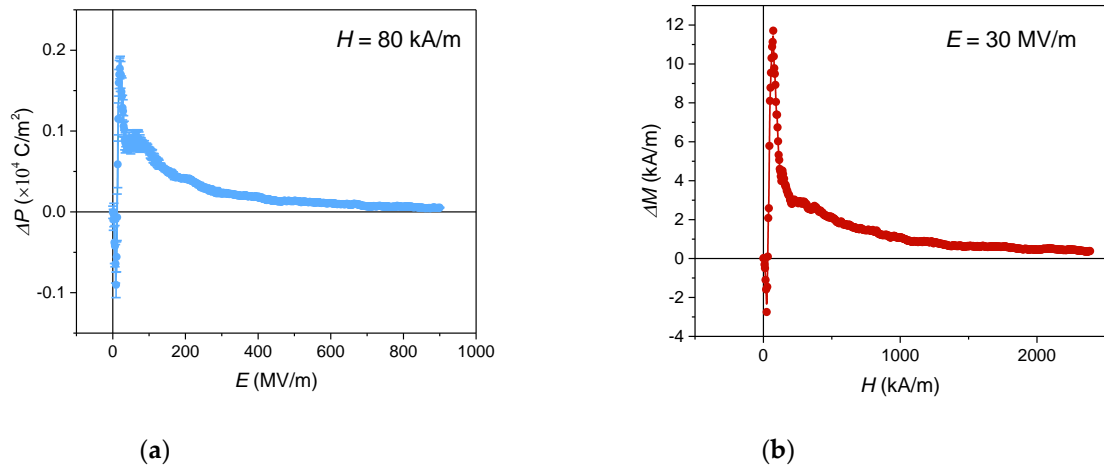

Figure S2. Differences between initial and modulated with external field curves: (a) polarization change  $\Delta P$  at the magnetic field 80 kA/m; (b) magnetization change  $\Delta M$  at the electric field strength 30 MV/m.
